# Supplementary material
Source: PubMed Central journal article supplement (PMC3038013)

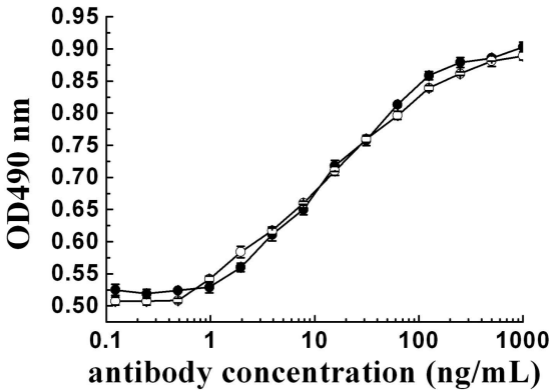

## **Supplemental Data**

### **Supplemental Materials and Methods**

#### **Cell lines, antibodies, and animals**

A431 cells, an EGFR-overexpressing epidermal cancer cell line, were obtained from the American Type Culture Collection (ATCC). Erbitux was purchased from ImClone Systems Incorporated. CMAB009, a recombinant human/mouse chimeric anti-EGFR monoclonal antibody, was produced using CHO cells by National Engineering Research Center of Antibody Medicine. Eight-week-old female nude Balb/c mice were housed in pathogen-free conditions and were treated in accordance with guideline of the Committee on Animals of the Second Military Medical University.

#### **Competitive binding assay**

The relative binding affinity of Erbitux and CMAB009 was determined using flow cytometry as described in serum level assay. A431 cells at  $1 \times 10^6$  /mL were incubated with a sub-saturating concentration of the FITC-cetuximab and different concentrations of competing antibodies for 45min at 4°C. The cells were then washed and analyzed by FCM. The EC50 values of competitors were calculated using a four-variable algorithm.

#### **In vitro inhibition of cell growth**

The in vitro inhibitory activity of Erbitux and CMAB009 was determined and compared. Briefly, A431 cells ( $8 \times 10^3$  cells/well) were plated in 96-well microtiter plates in complete growth medium. Serial dilutions of Erbitux and CMAB009 were added. Cells were allowed to proliferate for 4 days at 37°C in a humidified 5% CO<sub>2</sub>

atmosphere, and then the cell number was determined by means of the MTS/PMS method (Promega). The absorbance was measured at 490 nm, reference 630 nm using an ELISA plate reader.

### **Antibody-dependent cellular cytotoxicity (ADCC)**

Antibody-dependent cellular cytotoxicity (ADCC) activities were measured by lactate dehydrogenase (LDH)-releasing assay using the CytoTox 96 non-Radioactive Cytotoxicity Assay kit (Promega) according to the manufacturer's instructions. Briefly, the cells were incubated for 1 h in phenol red-free DMEM culture medium in a 5% CO<sub>2</sub> incubator at 37°C, followed by serial dilutions of Erbitux and CMAB009, then exposed to peripheral blood mononuclear cells (PBMCs) at effector/target ratios (E/T) of 20:1 for 7 h. The cell lysis was determined by measuring the amount of LDH released into the culture supernatant. The optical density (OD) was measured at 490 nm with ELISA plate reader.

### **Mouse tumor xenograft models**

For the animal studies, athymic nude mice (Balb/c; 6-8 week) were housed under clean conditions. Animals were inoculated subcutaneous with  $5 \times 10^6$  A431 cells. Tumors grew uniformly and could be easily measured by a caliper every other day, and tumor volume was calculated using the following formula: tumor volume (mm<sup>3</sup>) = length  $\times$  (width)<sup>2</sup> / 2. One week after inoculation, when tumors reached an average volume of 50 mm<sup>3</sup>, the mice were randomly allocated to six treatment groups (n = 10 mice per group). Then the mice were injected i.v. with CMAB009, Erbitux, cis-platinum, cis-DDP/CMAB009, cis-DDP/Erbitux, or the PBS control. Cis-DDP

was given at 6  $\mu\text{g/g}$  body weight once weekly for 2 weeks and antibodies were administered at 1 mg per mouse once weekly for 4 weeks. Control animals received injections of PBS. The mice were observed daily and euthanized at the onset of hind leg paralysis.

**Supplemental Table 1.** The composition of CMAB009 and Erbitux

| CMAB009                                  |                            | Erbitux                                  |                            |
|------------------------------------------|----------------------------|------------------------------------------|----------------------------|
| components                               | Amount per vial<br>(10 mL) | components                               | Amount per vial<br>(50 mL) |
| chimeric antibody                        | 100 mg                     | chimeric antibody                        | 100 mg                     |
| Sodium chloride                          | 80 mg                      | Sodium chloride                          | 424 mg                     |
| Sodium dihydrogen<br>phosphate dihydrate | 4.1 mg                     | Sodium dihydrogen<br>phosphate dihydrate | 20 mg                      |
| Disodium phosphate<br>dihydrate          | 25.1 mg                    | Disodium phosphate<br>dihydrate          | 66 mg                      |
| saccharobiose                            | 100 mg                     |                                          |                            |
| polysorbate 80                           | 0.7 mg                     |                                          |                            |

## **Supplemental Figure Legends**

**Supplemental Figure 1** CMAB009 induced ADCC as measured by LDH-releasing assay. The A431 cells were preincubated in phenol red-free DMEM culture medium with serial dilutions of the CMAB009 (●) and Erbitux (○). Thereafter human PBMC were added to the wells (E/T = 20:1). The cell lysis was determined by measuring the amount of LDH released into the culture supernatant. The absorbance was determined with a microplate reader using a 490 nm filter with a 630 nm reference filter. Data from multiple wells in one experiment are presented and expressed as mean ± SD, n = 3.

**Supplemental Figure 2** Growth inhibition of cultured A431 cells by CMAB009. The A431 cells were incubated with various concentrations of CMAB009 (●), positive control antibody Erbitux (○), and human IgG as negative control (□) for 4 days. Thereafter, the cell number was determined by means of the MTS/PMS method. The absorbance was determined with a microplate reader using a 490 nm filter with a 630 nm reference filter. Data from multiple wells in one experiment are presented and expressed as mean ± SD, n = 3.

**Supplemental Figure 3** Antigen-binding activity of CMAB009. The A431 cells were incubated with a subsaturating concentration of FITC-labeled anti-EGFR antibody and serial dilutions concentrations of competing antibodies CMAB009 (●), positive control antibody Erbitux (○), and human IgG as negative control (□) for 45min at 4°C. The cells were then washed and analyzed by FCM. Data from multiple tubes in one experiment are presented and expressed as mean ± SD, n = 3.

**Supplemental Figure 4** Efficacy of CMAB009 in tumor xenograft models using BALB/c mice. Groups of 10 mice were inoculated subcutaneous with  $5 \times 10^6$  A431 cells. 7 days after tumor cell inoculation, the mice then received various treatments. A, treatment with PBS, Erbitux, and CMAB009; B, treatment with PBS, cis-DDP, cis-DDP/Erbitux, and cis-DDP/CMAB009. Data are presented as mean  $\pm$  SD, n = 10.

**Supplemental Figure 5** Concentration-time curve of CMAB009 after a single intravenous infusion of  $100 \text{ mg/m}^2$  in individual subjects.

**OD490 nm**

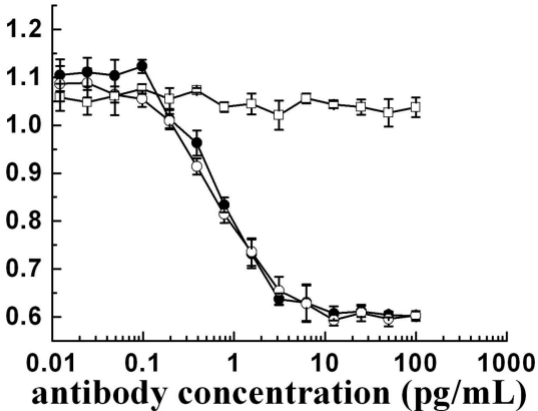



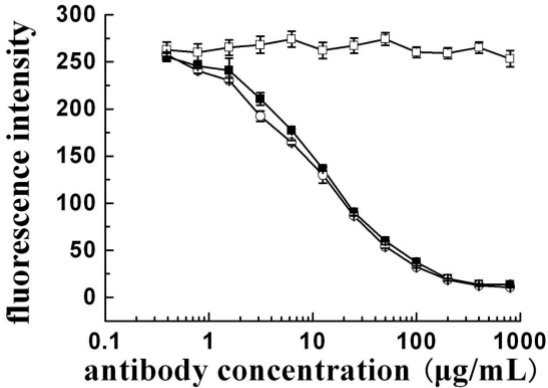

A

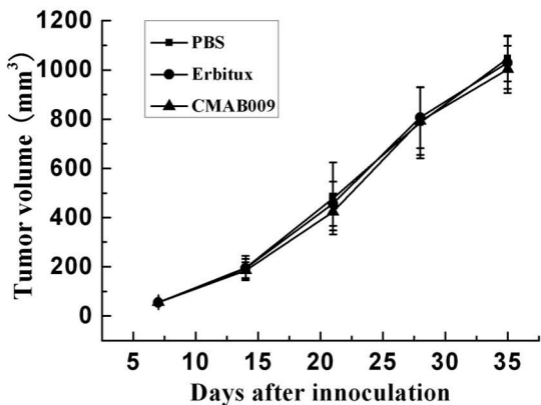

B

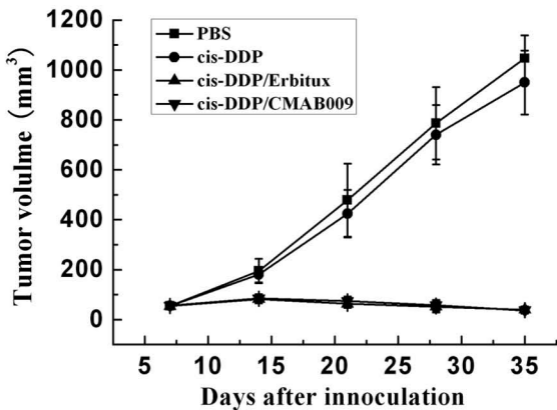

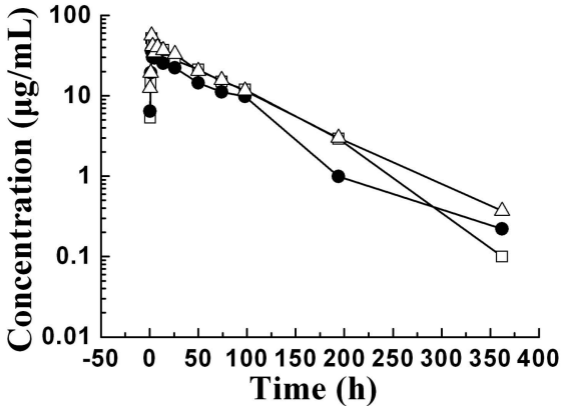

Supplement: mabs0301_0067SD1.pdf [file mabs0301_0067SD1.pdf]
